# Supplementary material
Source: ML conference proceedings conference paper supplement (https://openreview.net/forum?id=W6U2xSbiE1)
Supplement: supplementary_material [file attachment]

---

# Black-box Backdoor Defense via Zero-shot Image Purification Supplementary Material

---

Anonymous Author(s)

Affiliation

Address

email

## 1 A Theoretical Justification

### 2 A.1 Proof on rectified estimation of $\mathbf{x}_t$ in Equation 7

3 **Equation 7**  $\mathbf{x}'_t = \sqrt{\bar{\alpha}_t} \mathbf{A}^\dagger \mathbf{x}^A - \sqrt{\bar{\alpha}_t} \mathbf{A}^\dagger \mathbf{A} \mathbf{p} + (\mathbf{I} - \mathbf{A}^\dagger \mathbf{A}) \mathbf{x}_t + \mathbf{A}^\dagger \mathbf{A} \sqrt{1 - \bar{\alpha}_t} \boldsymbol{\epsilon}_t.$

4 *Proof.* Based on  $\mathbf{x}_t = \sqrt{\bar{\alpha}_t} \mathbf{x}_0 + \sqrt{1 - \bar{\alpha}_t} \boldsymbol{\epsilon}$ , we have a nice property [15]:

$$\mathbf{x}_{0|t} = \frac{1}{\sqrt{\bar{\alpha}_t}} (\mathbf{x}_t - \sqrt{1 - \bar{\alpha}_t} \boldsymbol{\epsilon}_t). \quad (1)$$

5 To ensure that the approximated clean image  $\mathbf{x}_{0|t}$  based on the  $t$ -th step observation  $\mathbf{x}_t$  satisfies the  
6 constraint in Equation 6, we have:

$$\mathbf{x}_{0|t} = \mathbf{A}^\dagger \mathbf{x}^A - \mathbf{A}^\dagger \mathbf{A} \mathbf{p} + (\mathbf{I} - \mathbf{A}^\dagger \mathbf{A}) \mathbf{x}_{0|t}. \quad (2)$$

7 Combine the above two equations, we can have:

$$\frac{1}{\sqrt{\bar{\alpha}_t}} (\mathbf{x}_t - \sqrt{1 - \bar{\alpha}_t} \boldsymbol{\epsilon}_t) = \mathbf{A}^\dagger \mathbf{x}^A - \mathbf{A}^\dagger \mathbf{A} \mathbf{p} + (\mathbf{I} - \mathbf{A}^\dagger \mathbf{A}) \left( \frac{1}{\sqrt{\bar{\alpha}_t}} (\mathbf{x}_t - \sqrt{1 - \bar{\alpha}_t} \boldsymbol{\epsilon}_t) \right). \quad (3)$$

8 Taking the derivative, we arrive at:

$$\mathbf{x}'_t = \sqrt{\bar{\alpha}_t} \mathbf{A}^\dagger \mathbf{x}^A - \sqrt{\bar{\alpha}_t} \mathbf{A}^\dagger \mathbf{A} \mathbf{p} + (\mathbf{I} - \mathbf{A}^\dagger \mathbf{A}) \mathbf{x}_t + \mathbf{A}^\dagger \mathbf{A} \sqrt{1 - \bar{\alpha}_t} \boldsymbol{\epsilon}_t. \quad (4)$$

9 □

### 10 A.2 Proof of Lemma 3.1

11 **Lemma 3.1** Suppose the estimated noise output by  $g_\phi(\cdot)$  is Gaussian. Given  $g_\phi(\mathbf{x}_t, t) = \boldsymbol{\epsilon}_t$ , we have  
12  $g_\phi((\mathbf{x}_t + \sqrt{\bar{\alpha}_t} \mathbf{A}^\dagger \mathbf{A} \mathbf{p}), t) = \boldsymbol{\epsilon}_t + \boldsymbol{\epsilon}'_t$ , where  $\boldsymbol{\epsilon}_t, \boldsymbol{\epsilon}'_t$  are also Gaussian.

13 *Proof.* Let us define the output of  $g_\phi((\mathbf{x}_t + \mathbf{x}'_t), t)$  as  $\hat{\boldsymbol{\epsilon}}_t$ , so we have  $g_\phi((\mathbf{x}_t + \mathbf{x}'_t), t) = \hat{\boldsymbol{\epsilon}}_t$ . Next,  
14 we define  $\boldsymbol{\epsilon}_t \sim N(\mu_1, \sigma_1^2)$  and  $\hat{\boldsymbol{\epsilon}}_t \sim N(\mu_2, \sigma_2^2)$ .

15 Since  $\hat{\boldsymbol{\epsilon}}_t$  also follows a Gaussian distribution, we can subtract  $\boldsymbol{\epsilon}_t$  from  $\hat{\boldsymbol{\epsilon}}_t$  to obtain  $\boldsymbol{\epsilon}'_t$ , such that:

$$\boldsymbol{\epsilon}'_t = \hat{\boldsymbol{\epsilon}}_t - \boldsymbol{\epsilon}_t \sim N(\mu_2 - \mu_1, \sigma_1^2 + \sigma_2^2) \quad (5)$$

16 This confirms that  $\boldsymbol{\epsilon}'_t$  is also Gaussian, thus completing the proof. □

### 17 A.3 Proof of Theorem 3.2

18 **Theorem 3.2** Suppose that  $g_\phi((\mathbf{x}_t + \sqrt{\bar{\alpha}_t} \mathbf{A}^\dagger \mathbf{A} \mathbf{p})) = \boldsymbol{\epsilon}_t + \boldsymbol{\epsilon}'_t$ . We define the error at step  $t$  between  
 19  $\hat{\mathbf{x}}_t$  and  $(\mathbf{x}_t + \sqrt{\bar{\alpha}_t} \mathbf{A}^\dagger \mathbf{A} \mathbf{p})$  as  $\boldsymbol{\delta}'_t$ , i.e.,  $\boldsymbol{\delta}'_t = \hat{\mathbf{x}}_t - (\mathbf{x}_t + \sqrt{\bar{\alpha}_t} \mathbf{A}^\dagger \mathbf{A} \mathbf{p})$ . Let  $\boldsymbol{\delta}_t = \mathbf{A} \boldsymbol{\delta}'_t$ , we have the  
 20 following bound on its norm:  $\|\boldsymbol{\delta}_t\| \leq \frac{(1-\bar{\alpha}_t)\sqrt{\alpha_{t+1}}}{\sqrt{1-\bar{\alpha}_{t+1}}} \|\mathbf{A}\| \|\boldsymbol{\epsilon}'_{t+1}\|$ .

21 *Proof.* We prove the above theorem by induction.

22 1 The base case is when  $t = T$ , where we have  $\hat{\mathbf{x}}_T - (\mathbf{x}_T + \sqrt{\bar{\alpha}_T} \mathbf{A}^\dagger \mathbf{A} \mathbf{p}) = 0$ , which holds.

23 2 Suppose for  $\hat{\mathbf{x}}_t - (\mathbf{x}_t + \sqrt{\bar{\alpha}_t} \mathbf{A}^\dagger \mathbf{A} \mathbf{p}) = \mathbf{A}^\dagger \boldsymbol{\delta}_t$ ,  $\|\boldsymbol{\delta}_t\| \leq \frac{(1-\bar{\alpha}_t)\sqrt{\alpha_{t+1}}}{\sqrt{1-\bar{\alpha}_{t+1}}} \|\mathbf{A}\| \|\boldsymbol{\epsilon}'_{t+1}\|$  is true.

24 3 Induction:

$$\mathbf{x}_{t-1} \leftarrow \frac{1}{\sqrt{\alpha_t}} (\sqrt{\bar{\alpha}_t} \mathbf{A}^\dagger \mathbf{x}^A - \sqrt{\bar{\alpha}_t} \mathbf{A}^\dagger \mathbf{A} \mathbf{p} + (\mathbf{I} - \mathbf{A}^\dagger \mathbf{A}) \mathbf{x}_t + \mathbf{A}^\dagger \mathbf{A} \sqrt{1 - \bar{\alpha}_t} \boldsymbol{\epsilon}_t - \frac{1 - \alpha_t}{\sqrt{1 - \bar{\alpha}_t}} \boldsymbol{\epsilon}_t) + \sigma_t \boldsymbol{\epsilon}, \quad (6)$$

$$\hat{\mathbf{x}}_{t-1} = \frac{1}{\sqrt{\alpha_t}} (\sqrt{\bar{\alpha}_t} \mathbf{A}^\dagger \mathbf{x}^A + (\mathbf{I} - \mathbf{A}^\dagger \mathbf{A}) \hat{\mathbf{x}}_t + \mathbf{A}^\dagger \mathbf{A} \sqrt{1 - \bar{\alpha}_t} (\boldsymbol{\epsilon}_t + \boldsymbol{\epsilon}'_t) - \frac{1 - \alpha_t}{\sqrt{1 - \bar{\alpha}_t}} (\boldsymbol{\epsilon}_t + \boldsymbol{\epsilon}'_t)) + \sigma_t \boldsymbol{\epsilon}, \quad (7)$$

$$\hat{\mathbf{x}}_{t-1} - \mathbf{x}_{t-1} \leftarrow \frac{1}{\sqrt{\alpha_t}} (\sqrt{\bar{\alpha}_t} \mathbf{A}^\dagger \mathbf{A} \mathbf{p} + (\mathbf{I} - \mathbf{A}^\dagger \mathbf{A}) (\sqrt{\bar{\alpha}_t} \mathbf{A}^\dagger \mathbf{A} \mathbf{p} + \mathbf{A}^\dagger \boldsymbol{\delta}_t) + \mathbf{A}^\dagger \mathbf{A} \sqrt{1 - \bar{\alpha}_t} \boldsymbol{\epsilon}'_t - \frac{1 - \alpha_t}{\sqrt{1 - \bar{\alpha}_t}} \boldsymbol{\epsilon}'_t) \quad (8)$$

25 By definition, we have  $\hat{\mathbf{x}}_{t-1} - (\mathbf{x}_{t-1} + \sqrt{\bar{\alpha}_{t-1}} \mathbf{A}^\dagger \mathbf{A} \mathbf{p}) = \boldsymbol{\delta}'_{t-1}$ . Let  $\boldsymbol{\delta}_{t-1} = \mathbf{A} \boldsymbol{\delta}'_{t-1}$ , we have  
 26  $\boldsymbol{\delta}_{t-1} = \mathbf{A} \boldsymbol{\delta}'_{t-1} = \mathbf{A} (\hat{\mathbf{x}}_{t-1} - (\mathbf{x}_{t-1} + \sqrt{\bar{\alpha}_{t-1}} \mathbf{A}^\dagger \mathbf{A} \mathbf{p}))$ . Since  $\mathbf{A}(\mathbf{I} - \mathbf{A}^\dagger \mathbf{A}) = \mathbf{0}$ , we can have:

$$\boldsymbol{\delta}_{t-1} = \frac{1}{\sqrt{\alpha_t}} (\mathbf{A} \sqrt{1 - \bar{\alpha}_t} \boldsymbol{\epsilon}'_t - \mathbf{A} \frac{1 - \alpha_t}{\sqrt{1 - \bar{\alpha}_t}} \boldsymbol{\epsilon}'_t) = \frac{(1 - \bar{\alpha}_{t-1}) \sqrt{\alpha_t}}{\sqrt{1 - \bar{\alpha}_t}} \mathbf{A} \boldsymbol{\epsilon}'_t \quad (9)$$

27 Based on the Cauchy–Schwarz inequality:

$$\|\boldsymbol{\delta}_{t-1}\| = \left\| \frac{(1 - \bar{\alpha}_{t-1}) \sqrt{\alpha_t}}{\sqrt{1 - \bar{\alpha}_t}} \mathbf{A} \boldsymbol{\epsilon}'_t \right\| \leq \frac{(1 - \bar{\alpha}_{t-1}) \sqrt{\alpha_t}}{\sqrt{1 - \bar{\alpha}_t}} \|\mathbf{A}\| \|\boldsymbol{\epsilon}'_t\| \quad (10)$$

28  $\square$

### 29 A.4 Proof of Corollary 3.2.1

30 **Corollary 3.2.1** When  $t = 0$ , we have  $\hat{\mathbf{x}}_0 = \mathbf{x}_0 + \mathbf{A}^\dagger \mathbf{A} \mathbf{p} + \boldsymbol{\delta}'_0$ , where  $\mathbf{A} \boldsymbol{\delta}'_0 = \mathbf{0}$ .

31 *Proof.* First, we have:

$$\mathbf{x}_0 \leftarrow \frac{1}{\sqrt{\alpha_1}} (\sqrt{\bar{\alpha}_1} \mathbf{A}^\dagger \mathbf{x}^A - \sqrt{\bar{\alpha}_1} \mathbf{A}^\dagger \mathbf{A} \mathbf{p} + (\mathbf{I} - \mathbf{A}^\dagger \mathbf{A}) \mathbf{x}_1 + \mathbf{A}^\dagger \mathbf{A} \sqrt{1 - \bar{\alpha}_1} \boldsymbol{\epsilon}_1 - \frac{1 - \alpha_1}{\sqrt{1 - \bar{\alpha}_1}} \boldsymbol{\epsilon}_1) + \sigma_1 \boldsymbol{\epsilon}, \quad (11)$$

$$\hat{\mathbf{x}}_0 = \frac{1}{\sqrt{\alpha_1}} (\sqrt{\bar{\alpha}_1} \mathbf{A}^\dagger \mathbf{x}^A + (\mathbf{I} - \mathbf{A}^\dagger \mathbf{A}) \hat{\mathbf{x}}_1 + \mathbf{A}^\dagger \mathbf{A} \sqrt{1 - \bar{\alpha}_1} (\boldsymbol{\epsilon}_1 + \boldsymbol{\epsilon}'_1) - \frac{1 - \alpha_1}{\sqrt{1 - \bar{\alpha}_1}} (\boldsymbol{\epsilon}_1 + \boldsymbol{\epsilon}'_1)) + \sigma_1 \boldsymbol{\epsilon}, \quad (12)$$

32 Then we can have:

$$\mathbf{A} \boldsymbol{\delta}'_0 = \frac{(1 - \alpha_0) \sqrt{\alpha_1}}{\sqrt{1 - \bar{\alpha}_1}} \mathbf{A} \boldsymbol{\epsilon}'_1. \quad (13)$$

33 Since  $\alpha_0 = 1$ , then we have  $\mathbf{A} \boldsymbol{\delta}'_0 = \mathbf{0}$ .  $\square$

## 34 B Qualitative Results of Purification

### 35 B.1 Qualitative Results of Purification on BadNet Attack

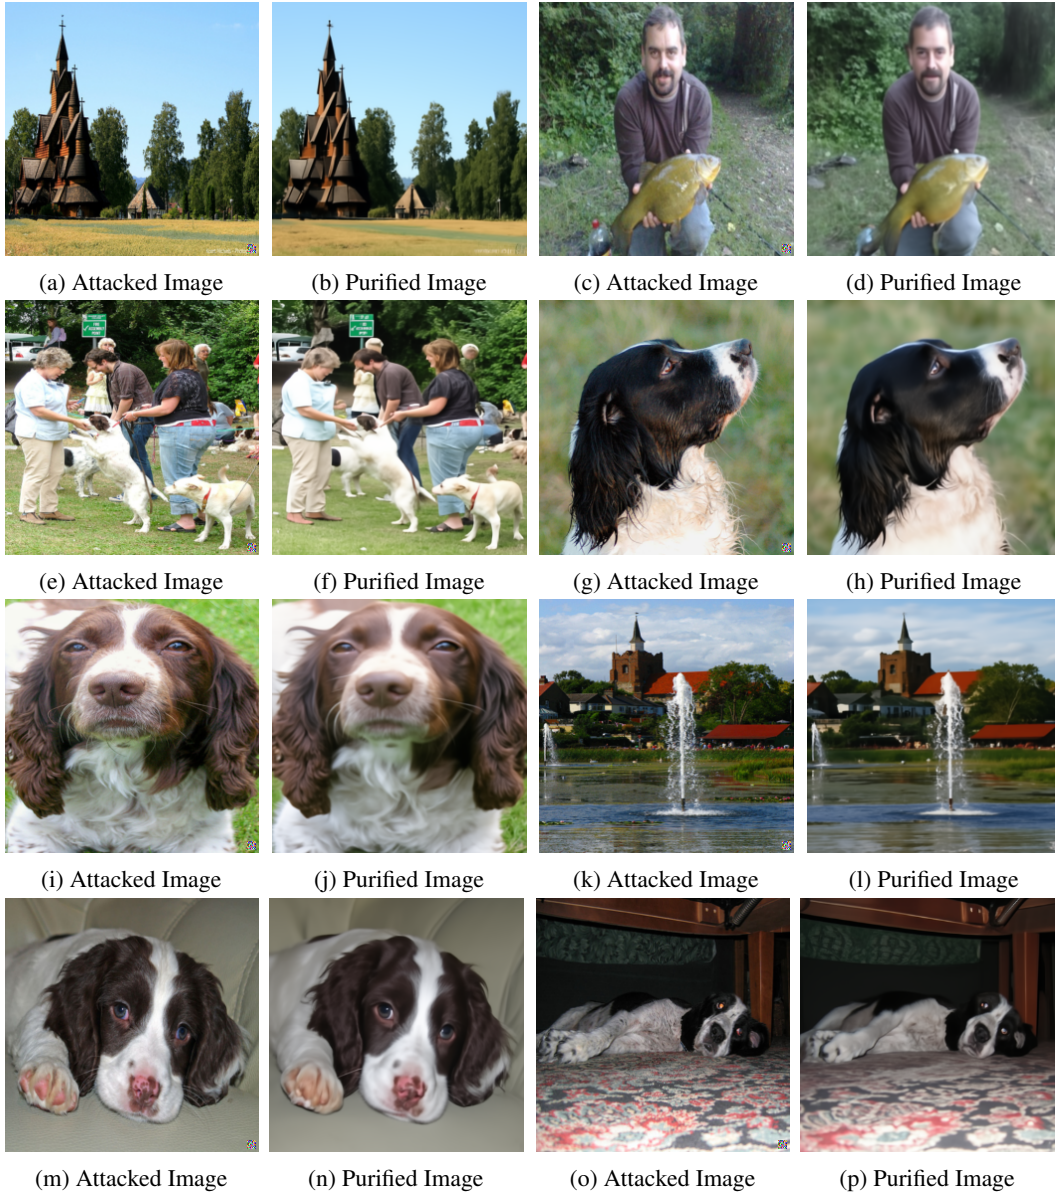

Figure 1: Comparison of Purified and BadNet Attack Images(Part1).



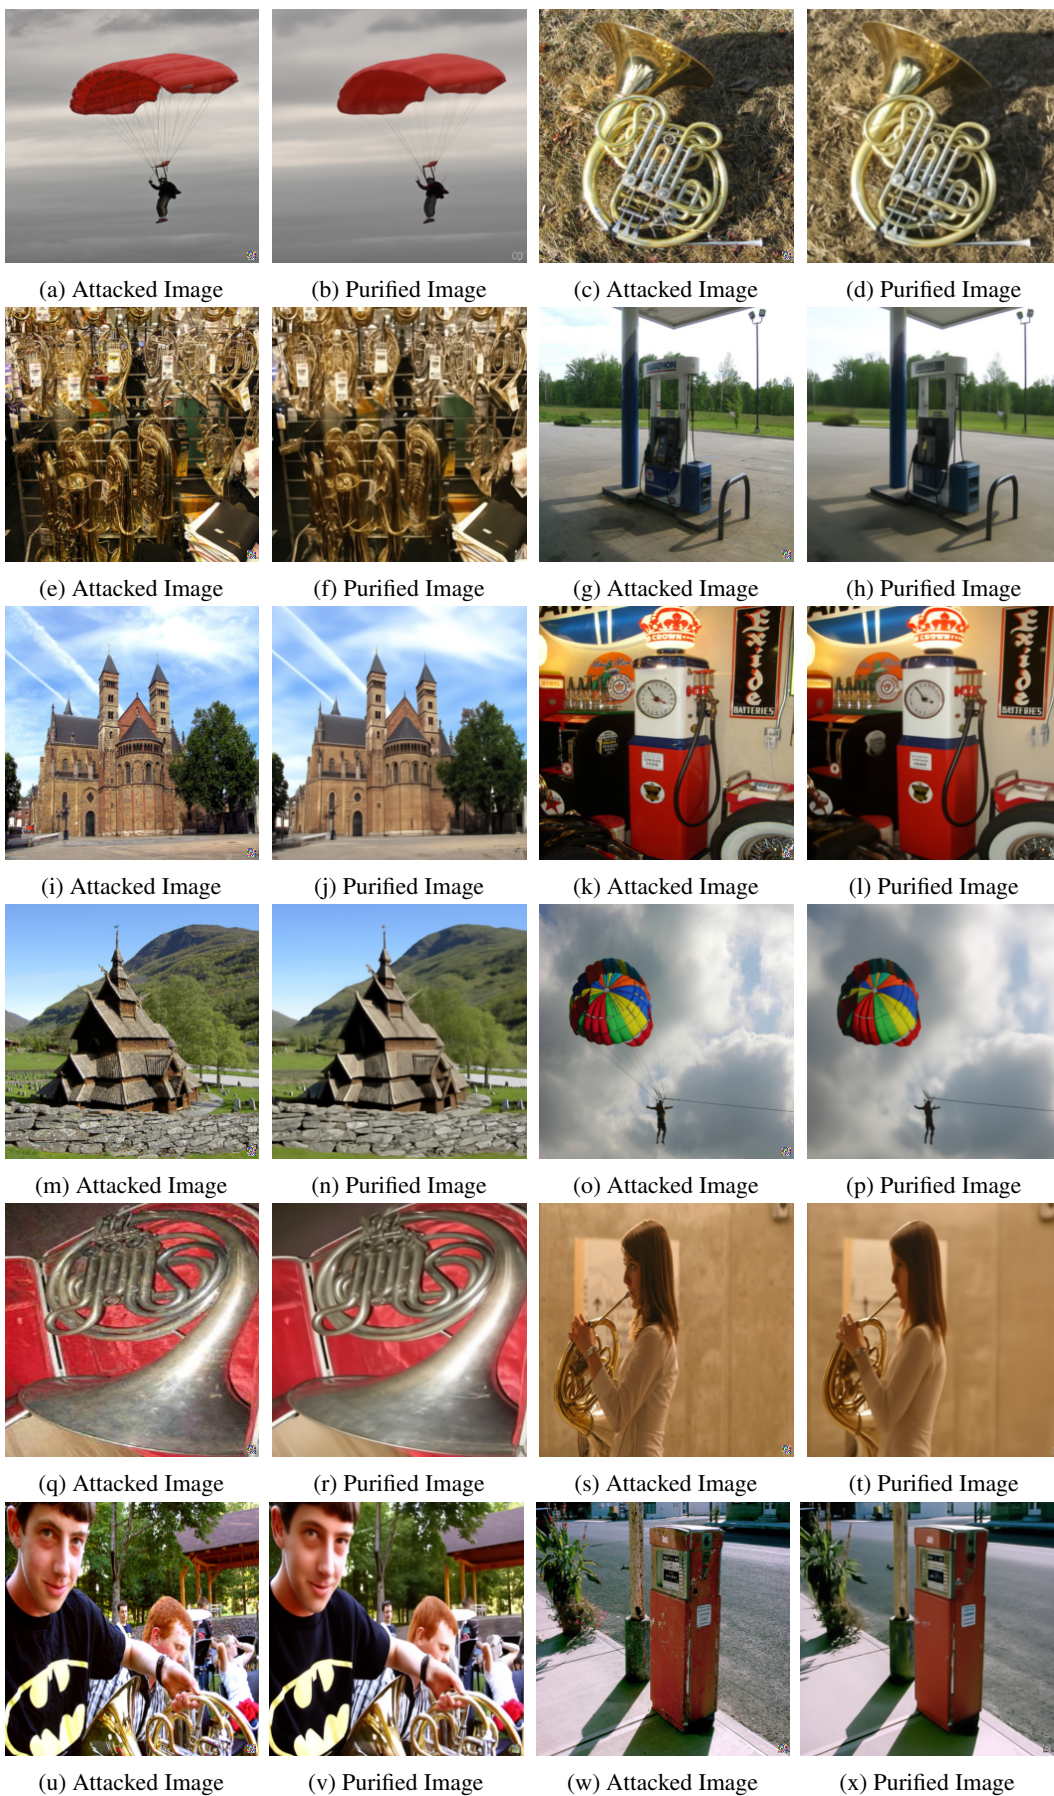

4  
Figure 2: Comparison of Purified and BadNet Attack Images(Part2).



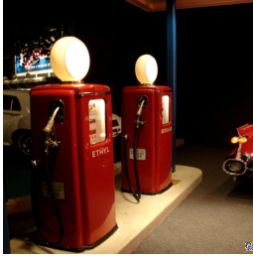

(a) Attacked Image

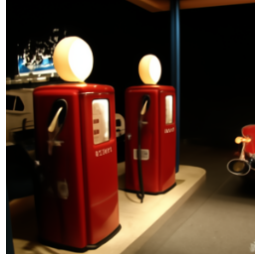

(b) Purified Image

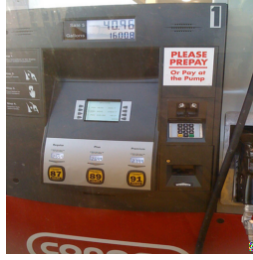

(c) Attacked Image

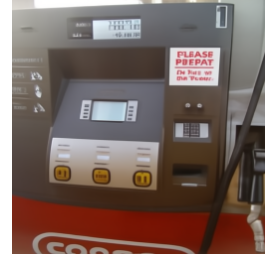

(d) Purified Image

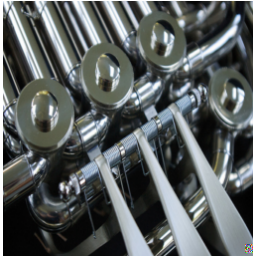

(e) Attacked Image

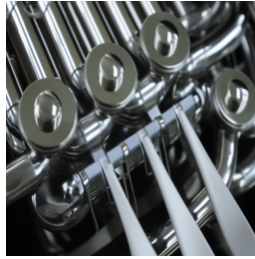

(f) Purified Image

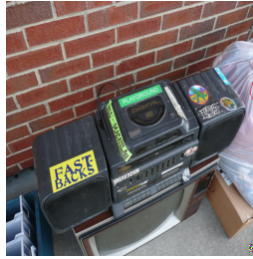

(g) Attacked Image

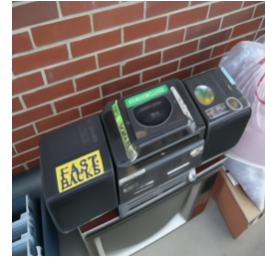

(h) Purified Image

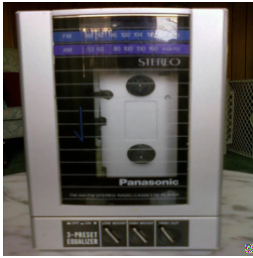

(i) Attacked Image

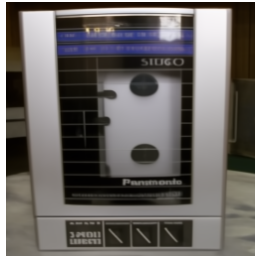

(j) Purified Image

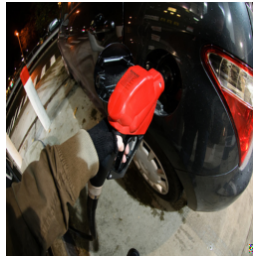

(k) Attacked Image

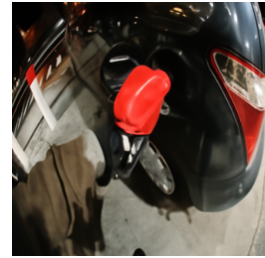

(l) Purified Image

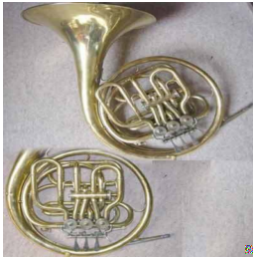

(m) Attacked Image

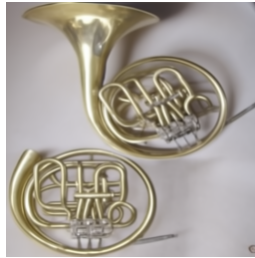

(n) Purified Image

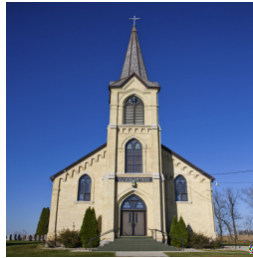

(o) Attacked Image

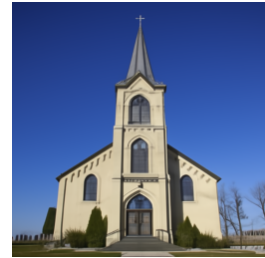

(p) Purified Image

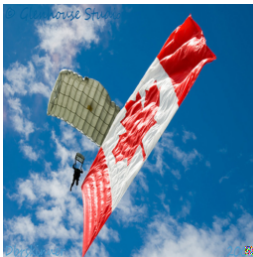

(q) Attacked Image

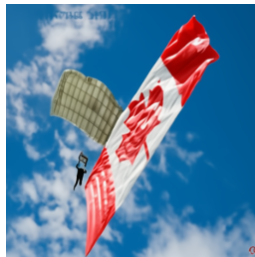

(r) Purified Image

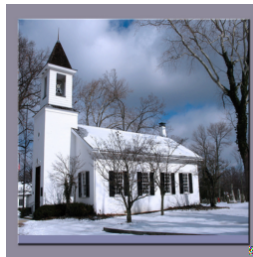

(s) Attacked Image

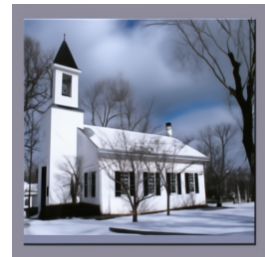

(t) Purified Image

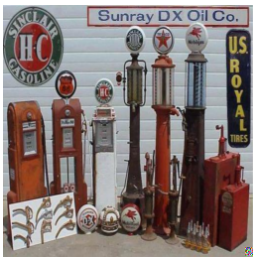

(u) Attacked Image

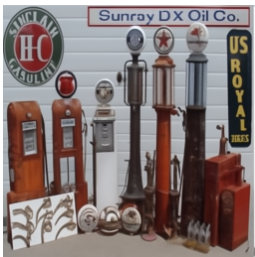

(v) Purified Image

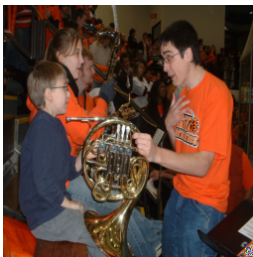

(w) Attacked Image

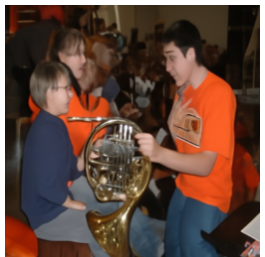

(x) Purified Image

Figure 3: Comparison of Purified and BadNet Attack Images(Part3).



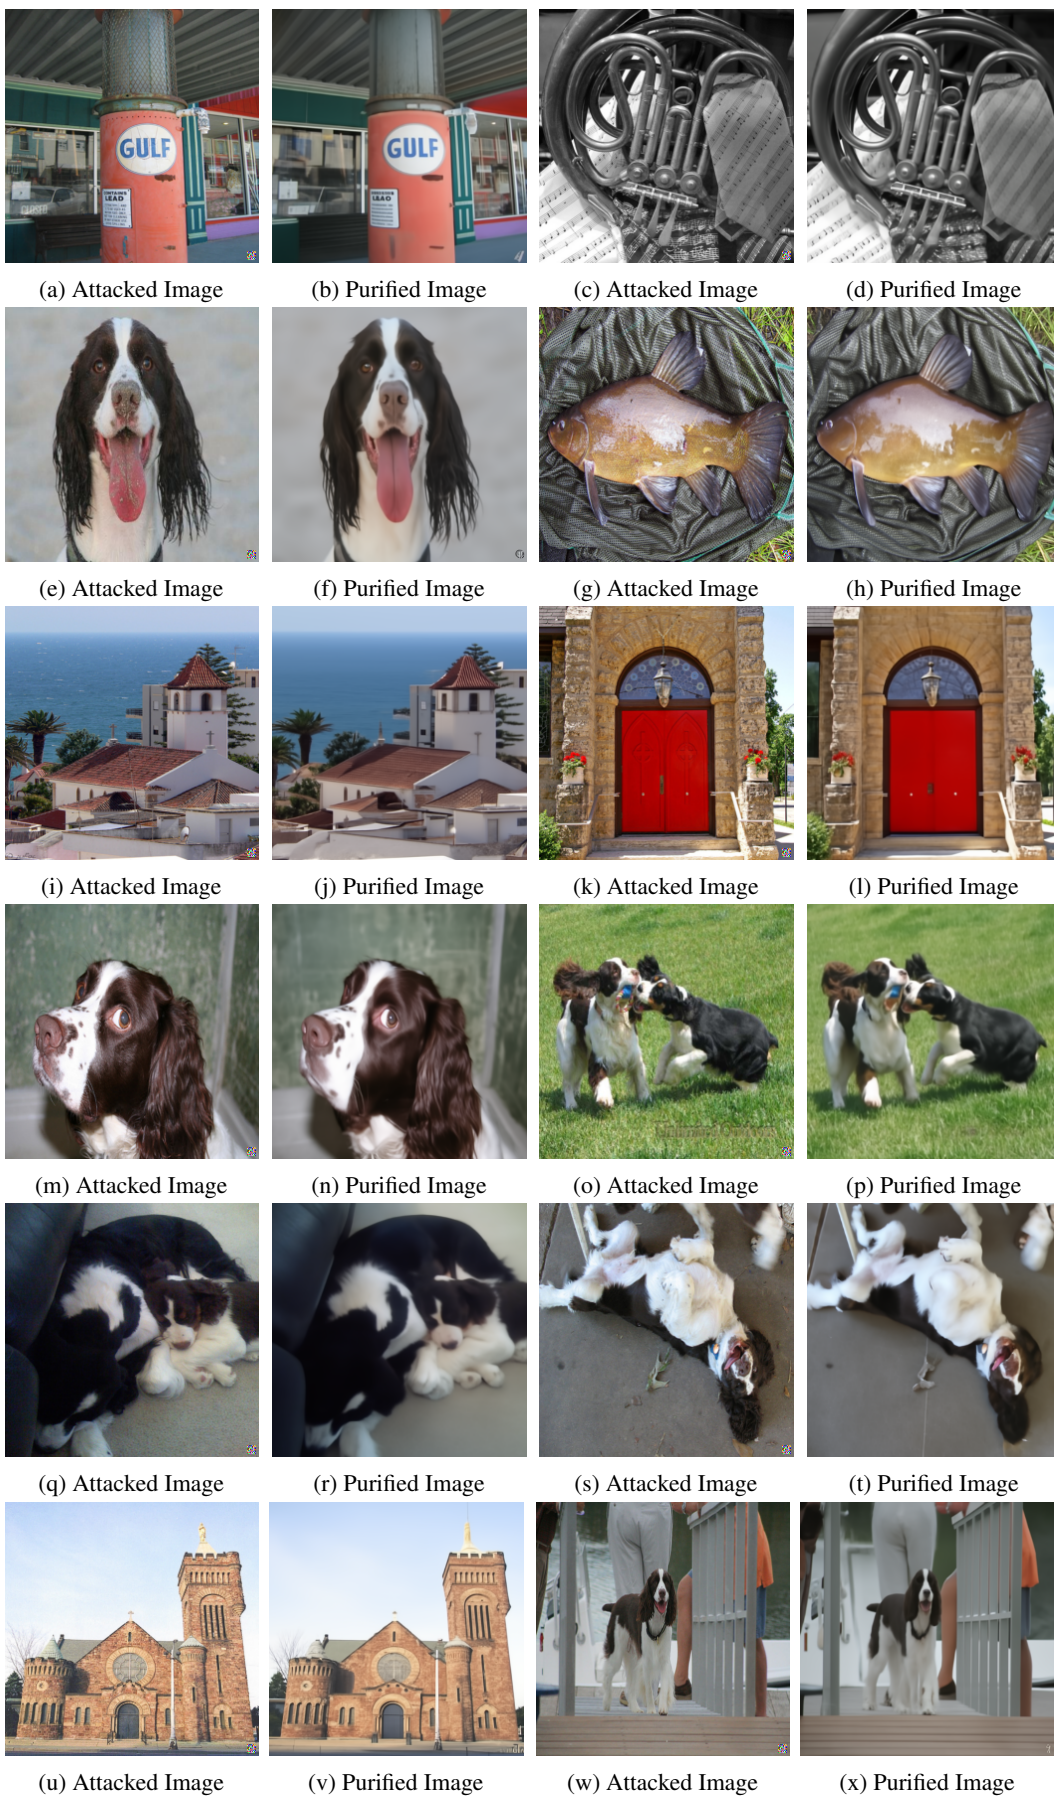

6  
Figure 4: Comparison of Purified and BadNet Attack Images(Part4).



36 **B.2 Qualitative Results of Purification on Blended Attack**

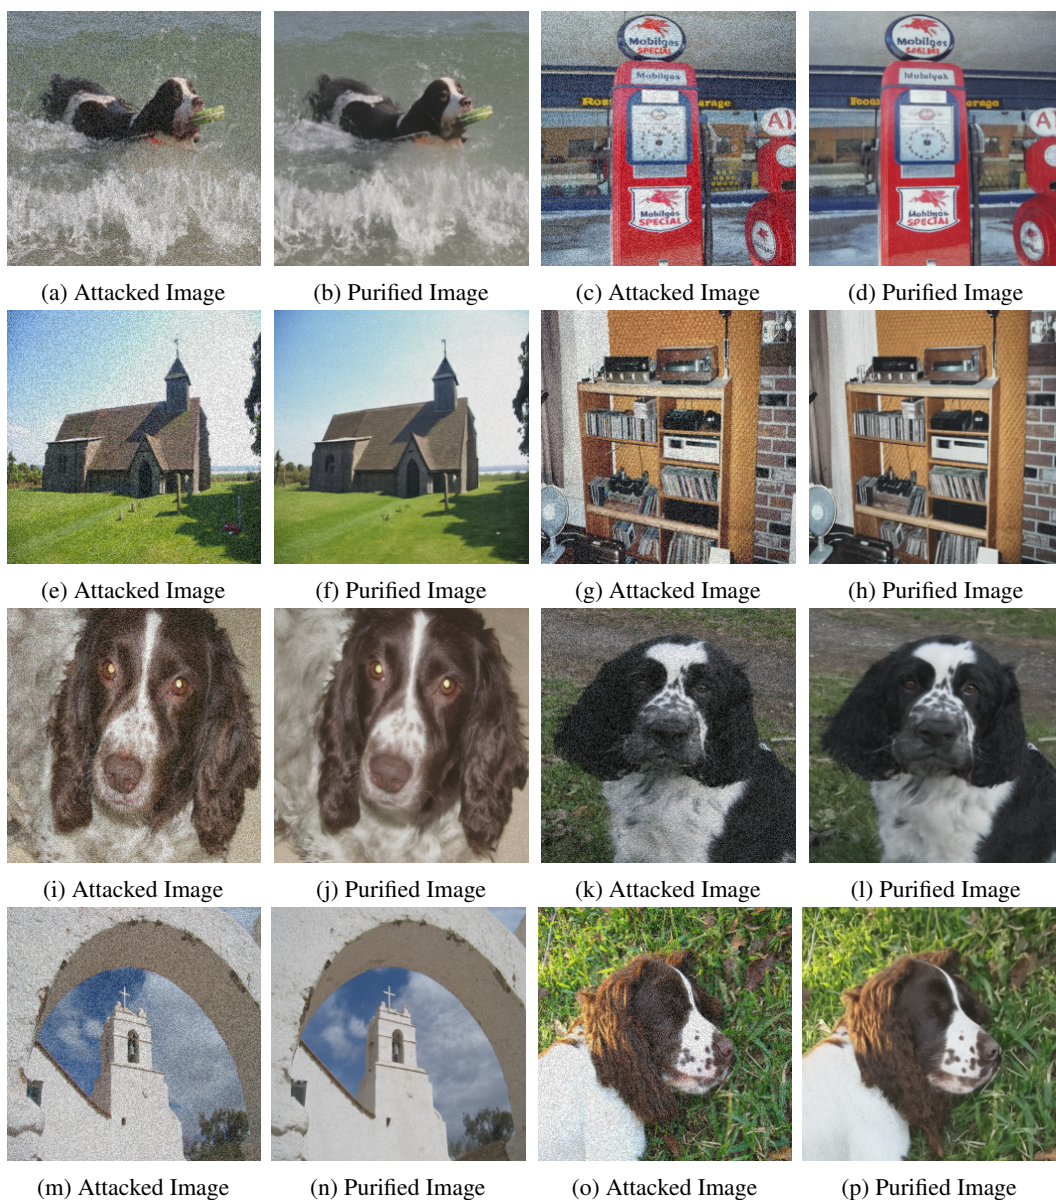

Figure 5: Comparison of Purified and Blended Attack Images(Part1).



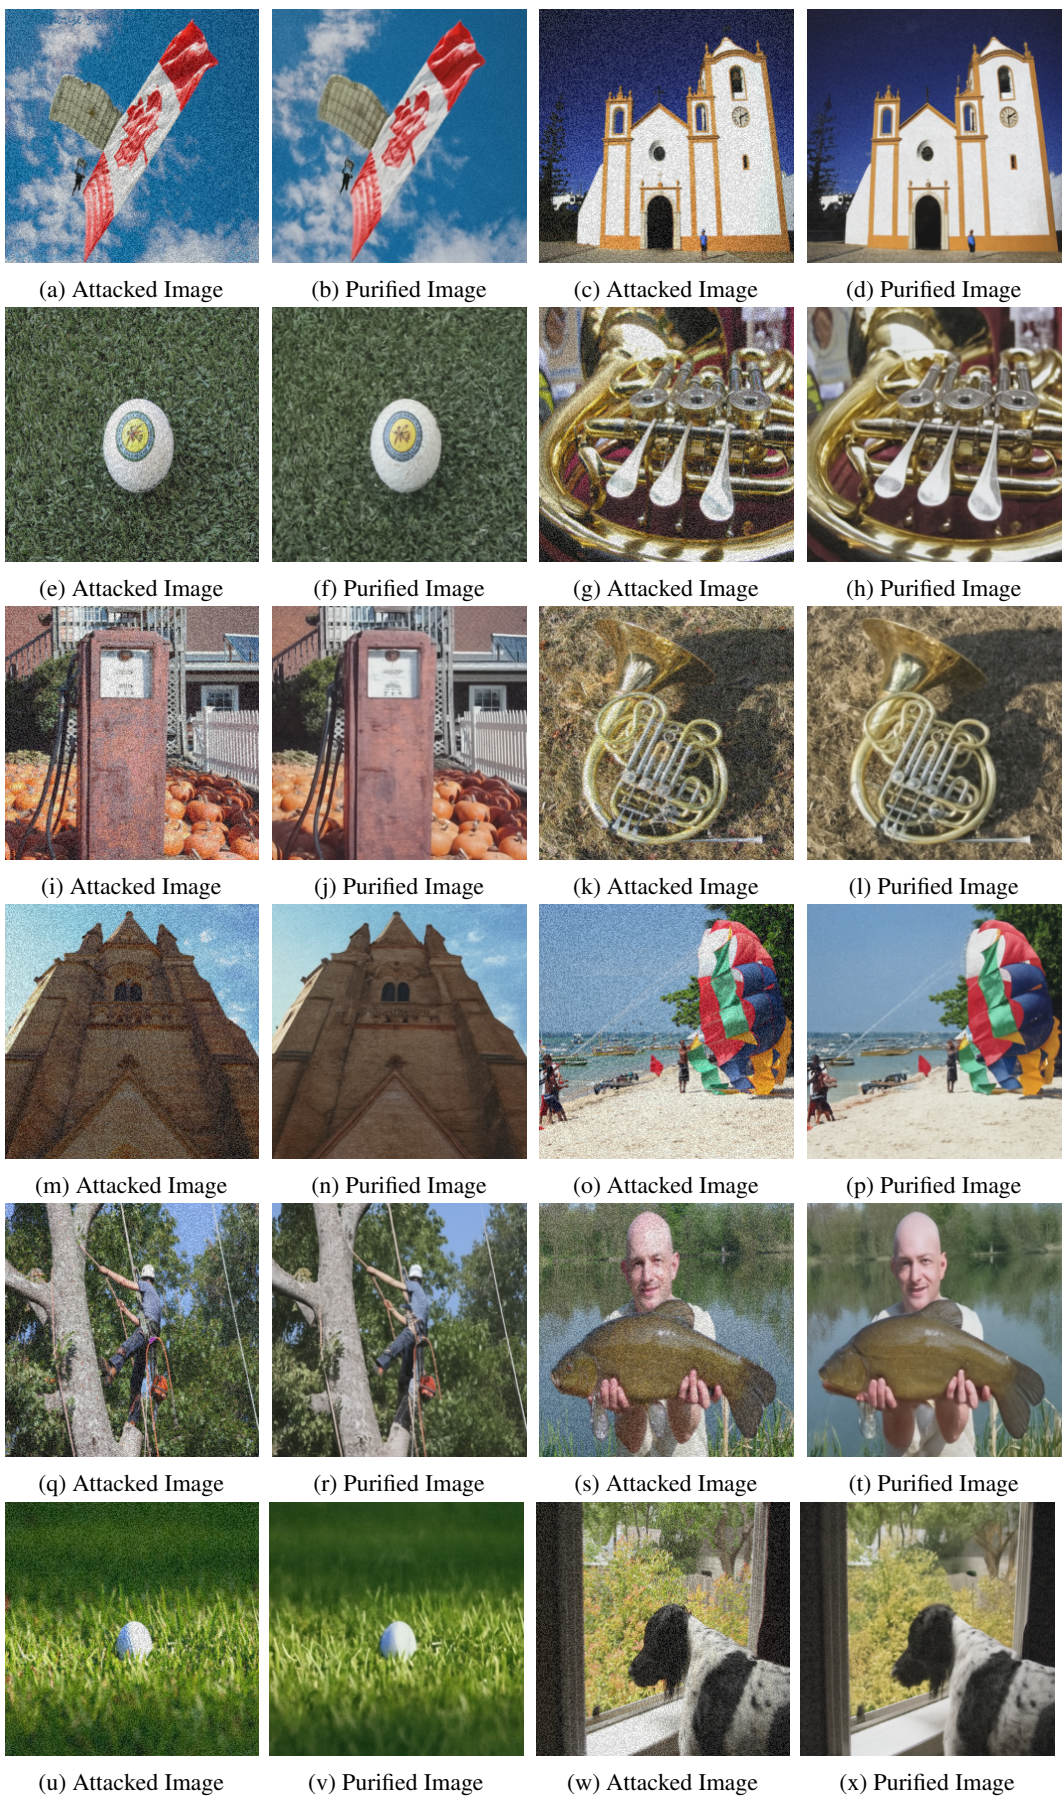

8  
Figure 6: Comparison of Purified and Blended Attack Images(Part2).



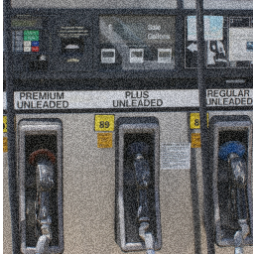

(a) Attacked Image

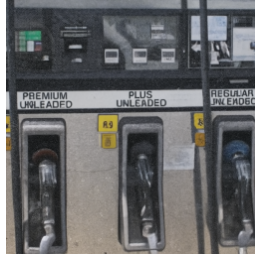

(b) Purified Image

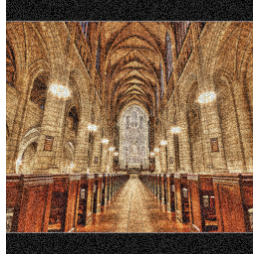

(c) Attacked Image

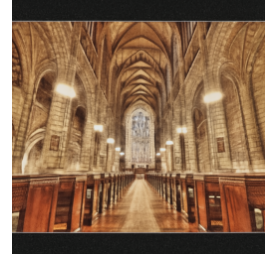

(d) Purified Image

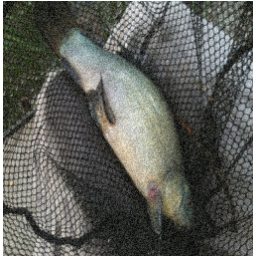

(e) Attacked Image

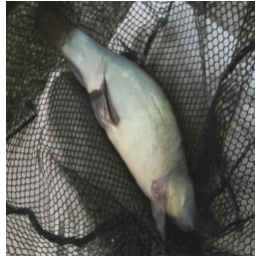

(f) Purified Image

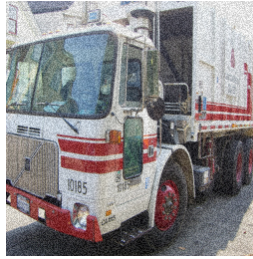

(g) Attacked Image

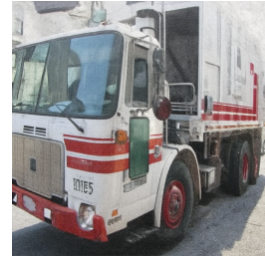

(h) Purified Image

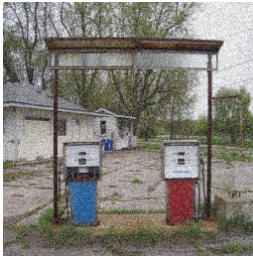

(i) Attacked Image

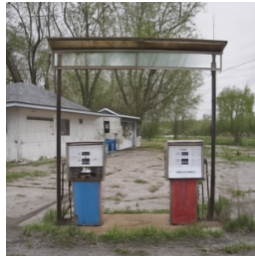

(j) Purified Image

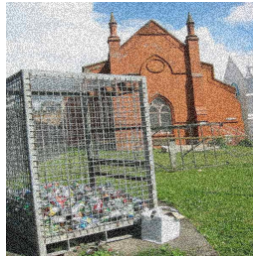

(k) Attacked Image

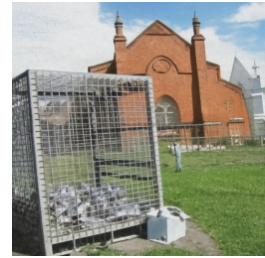

(l) Purified Image

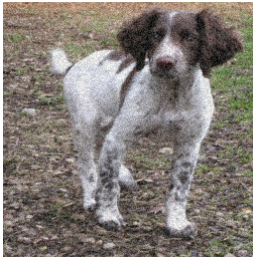

(m) Attacked Image

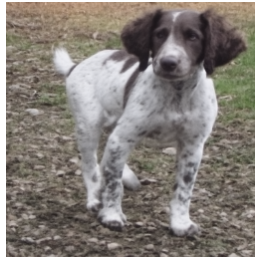

(n) Purified Image

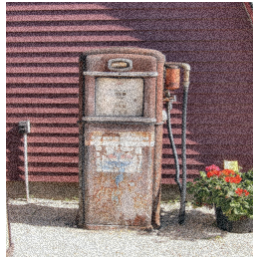

(o) Attacked Image

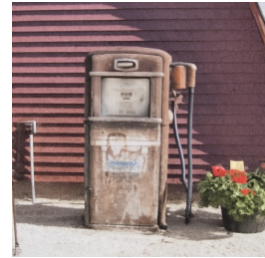

(p) Purified Image

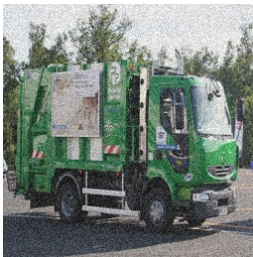

(q) Attacked Image

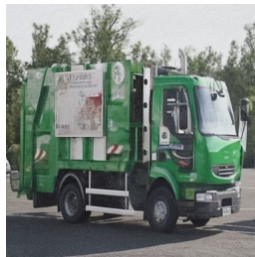

(r) Purified Image

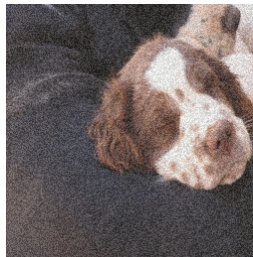

(s) Attacked Image

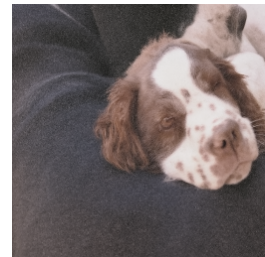

(t) Purified Image

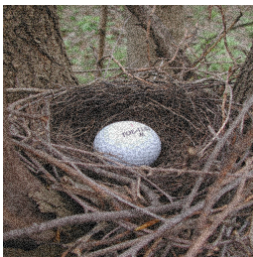

(u) Attacked Image

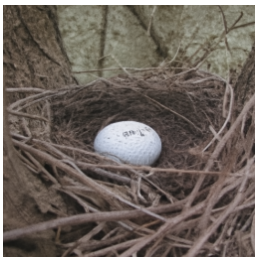

(v) Purified Image

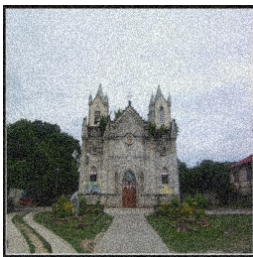

(w) Attacked Image

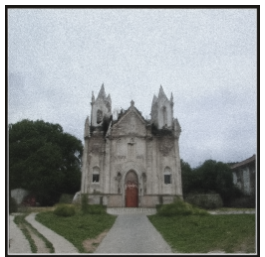

(x) Purified Image



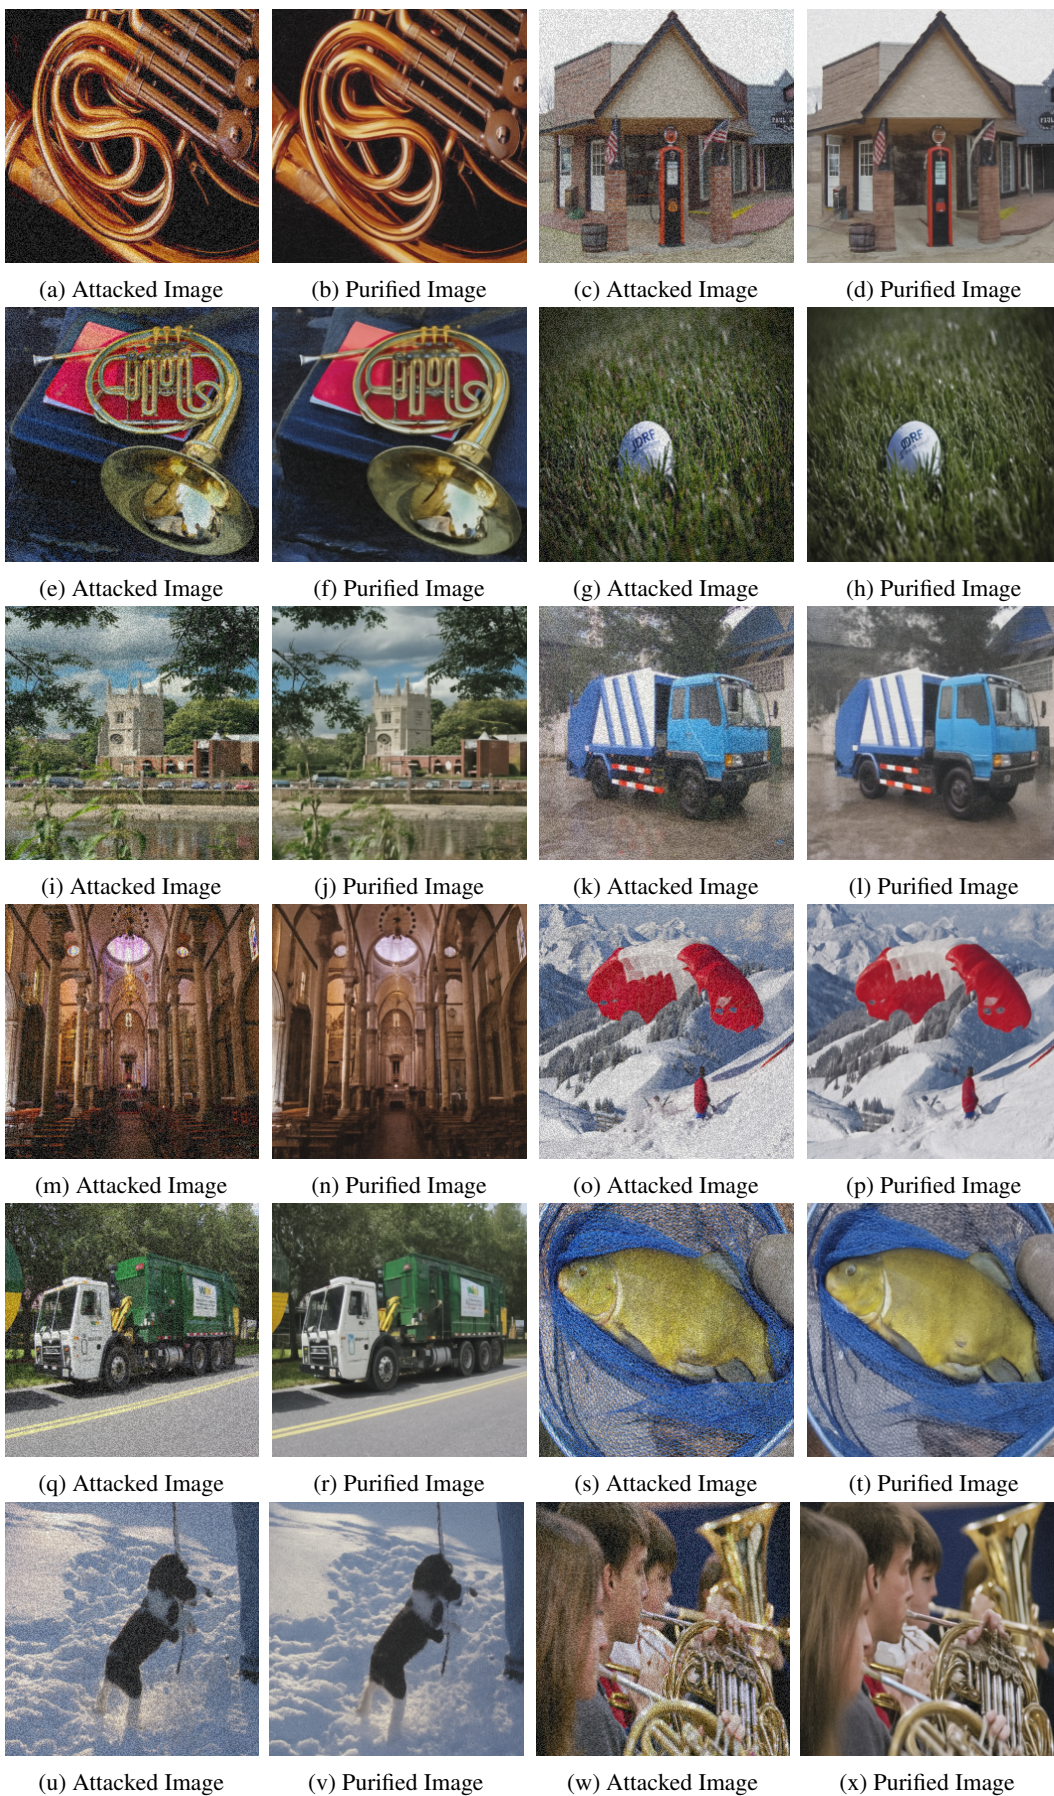

10  
Figure 8: Comparison of Purified and Blended Attack Images(Part4).



## 37 C Details on Linear Transformations

38 In this section, we discuss details of the linear transformation applied in our paper. Two practical  
 39 examples are discussed to illustrate the simplicity and effectiveness of linear transformations, along  
 40 with the corresponding operators used.

41 **Gray-scale Conversion:** To convert an RGB image to gray-scale, the operator  $\mathbf{A} = [1/3, 1/3, 1/3]$   
 42 can be defined as a pixel-wise operation that transforms each RGB channel pixel  $[r, g, b]$  into a gray-  
 43 scale value  $r^3 + g^3 + b^3$ . In this case, constructing a pseudo-inverse  $\mathbf{A}^\dagger = [1, 1, 1]^T$  is straightforward,  
 44 satisfying the condition  $\mathbf{A}\mathbf{A}^\dagger \equiv \mathbf{I}$ , where  $\mathbf{I}$  represents the identity matrix.

45 **Image Blurring:** Image blurring also involves linear transformations. For a blurring operation with  
 46 scale  $n$ , the operator  $\mathbf{A}$  is defined as the average-pooling operator  $[1/n^2, \dots, 1/n^2]$ . This operator  
 47 aggregates each patch of the image into a single value. Similarly, the pseudo-inverse  $\mathbf{A}^\dagger$  can be built  
 48 as  $\mathbf{A}^\dagger = [1, \dots, 1]^T$  to fulfill the condition  $\mathbf{A}\mathbf{A}^\dagger \equiv \mathbf{I}$ .

49 Overall, these examples demonstrate how these two linear transformations, in conjunction with their  
 50 respective operators, can be employed to destruct the trigger pattern without relying on a complex  
 51 Fourier transform. In cases where the linear transformation is too complex to solve for its pseudo-  
 52 inverse, the Singular Value Decomposition (SVD) method can be applied. For more details, please  
 53 refer to papers [34, 21].

## 54 D Algorithm for improved ZIP based on DDIM

55 In this section, we include the modified algorithm based on DDIM, which is proposed to speed up the  
 56 diffusion model inference speed.

---

### Algorithm 1 Zero-shot Image Purification (based on DDIM)

---

**Require:** Test image for purification  $\mathbf{x}^P$ ; liner transformation  $\mathbf{A}_1, \mathbf{A}_2, \dots, \mathbf{A}_n$  and their pseudo-  
 inverse  $\mathbf{A}_1^\dagger, \mathbf{A}_2^\dagger, \dots, \mathbf{A}_n^\dagger$ ; diffusion model  $g$ ; hyperparameter  $\lambda$ ; speed-up pace  $S$ .

**Ensure:**  $\mathbf{x}^{A_n} = \mathbf{A}_n \mathbf{x}^P$ ,  $n = 0, 1, \dots, N$

```

1:  $\mathbf{x}^T \sim \mathcal{N}(\mathbf{0}, \mathbf{I})$ 
2: for  $t = T, T - S, \dots, S, 1$  do
3:    $\epsilon \sim \mathcal{N}(\mathbf{0}, \mathbf{I})$  if  $t > 1$ , else  $\epsilon = \mathbf{0}$ 
4:    $\epsilon_t = g_\phi(\mathbf{x}_t, t)$ 
5:   for  $n = 1, 2, \dots, N$  do
6:      $\hat{\mathbf{x}}_t^n = \sqrt{\bar{\alpha}_t} \mathbf{A}_1^\dagger \mathbf{x}^{A_n} + (\mathbf{I} - \mathbf{A}_n^\dagger \mathbf{A}_n) \mathbf{x}_t + \mathbf{A}_n^\dagger \mathbf{A}_n \sqrt{1 - \bar{\alpha}_t} \epsilon_t$ 
7:   end for
8:    $\hat{\mathbf{x}}_t = \frac{1}{N} (\hat{\mathbf{x}}_t^1 + \hat{\mathbf{x}}_t^2 + \dots + \hat{\mathbf{x}}_t^N)$ 
9:    $\tilde{\mathbf{x}}_t = (1 - \bar{\alpha}_t^\lambda) \hat{\mathbf{x}}_t + \bar{\alpha}_t^\lambda \mathbf{x}_t$ 
10:   $\tilde{\mathbf{x}}_{0|t} = \frac{1}{\sqrt{\bar{\alpha}_t}} (\tilde{\mathbf{x}}_t - \sqrt{1 - \bar{\alpha}_t} \epsilon_t)$ 
11:   $\mathbf{x}_{t-1} \leftarrow \sqrt{\bar{\alpha}_{t-1}} \tilde{\mathbf{x}}_{0|t} + \sqrt{1 - \bar{\alpha}_{t-1} - \sigma_t^2} \epsilon_t + \sigma_t \epsilon$ 
12: end for
13: return  $\mathbf{x}_0$ 
```

---

## 57 E Experiments Settings

### 58 E.1 Datasets Informaiton

59 **CIFAR-10 [22]** The CIFAR-10 dataset is a widely-used benchmark in computer vision. It consists of  
 60 60,000 color images of size 32x32 pixels, belonging to 10 different classes, with 6,000 images per  
 61 class. The dataset is divided into 50,000 training images and 10,000 test images, with a balanced  
 62 distribution of classes.

63 **GTSRB [31]** The German Traffic Sign Recognition Benchmark (GTSRB) dataset is designed for  
 64 traffic sign classification tasks. It comprises more than 50,000 images of traffic signs captured under  
 65 various real-world conditions. The images have different sizes and aspect ratios, but they are resized

66 to 32x32 pixels for our model training and evaluation. The dataset is divided into training and test  
 67 sets, with its official split ratio.

68 **Imagenette [17]** The Imagenette is a subset of the larger ImageNet dataset and is commonly used  
 69 as a smaller-scale alternative for image classification tasks. It consists of 10 classes with a total of  
 70 13,000 images. The images in Imagenette have varying sizes, but they are resized to 256x256 pixels  
 71 for consistency. The dataset is split into training and validation sets, following a predefined split ratio.

Table 1: Properties of datasets.

| Dataset    | Classes | Image Size | Train Split | Test Split |
|------------|---------|------------|-------------|------------|
| CIFAR-10   | 10      | 32x32      | 50,000      | 10,000     |
| GTSRB      | 43      | 32x32      | 39,209      | 12,630     |
| Imagenette | 10      | 256x256    | 9,480       | 3,936      |

## 72 E.2 Attacks Implementation

73 In this section, we discuss the implementation details of three different backdoor attack methods  
 74 employed in our study: BadNet, Blended, and PhysicalBA. We implement these backdoor attacks  
 75 using the Backdoorbox framework [24], which is under GNU general public license.

76 **BadNet [11]** The BadNet attack injects specific trigger patterns into the training data. In our  
 77 implementation, we set the poisoned rate to 5%, i.e., 5% of the training samples are selected as attack  
 78 samples and have the trigger pattern added to them. The trigger pattern size is set to 2x2 for 32x32  
 79 pixels images and 9x9 for 256x256 pixels images. The trigger patterns are randomly generated.

80 **Blended [7]** The Blended attack is a more sophisticated variant aimed at making the backdoor less  
 81 conspicuous and harder to detect. Following the suggestion in BackdoorBox, we set the blended rate  
 82 to 0.2 and the poisoned rate to 5%. The blended pattern is randomly generated, seamlessly blending  
 83 the trigger pattern into the attack samples.

84 **PhysicalBA [25]** The PhysicalBA (Physical Backdoor Attack) is a specific type of attack that  
 85 introduces variations in the location and appearance of the attack pattern embedded in the test samples  
 86 during inference time. In our implementation, we apply the same attack pattern size as the BadNet  
 87 attack, using a 2x2 pattern for 32x32 pixels images and a 9x9 pattern for 256x256 pixels images. The  
 88 attack patterns are generated randomly. We set the poisoned rate to 5% for this attack.

89 All other attack settings follow the default configurations in Backdoorbox [24].

## 90 E.3 Purification Implementation

91 We utilize a pre-trained model provided by OpenAI [8] under the MIT license. The algorithm  
 92 described in Algorithm 1 is employed to accelerate the inference process, allowing us to generate  
 93 high-quality images within just 20 steps, and the speed-up pace is set to 50. We set the hyperparameter  
 94  $\lambda$  to a value of 2 for Blended attack defense, and 10 for BadNet and PhysicalBA attack defense.

95 Specifically, for the CIFAR-10 dataset, we apply both blur and gray-scale conversion as linear trans-  
 96 formations. For the GTSRB and Imagenette datasets, we solely apply blur as the linear transformation.  
 97 Additional implementation details can be found in the code we have provided.

## 98 F Ablation Study Settings

### 99 F.1 Enhanced Attack Settings

100 In the enhanced attack settings, our first step is to extract 5% of the training dataset and inject the  
 101 attack’s trigger pattern into these images. We then proceed to purify this subset of data using blur  
 102 and grayscale as linear transformations during the first stage of our proposed purification. Once the  
 103 attacked images have been successfully purified, we modify their labels to reflect the attack label.  
 104 Following this, we introduce these purified images as poisoned samples into the training set and train  
 105 a classification model from scratch. This comprehensive procedure is referred to as the enhanced  
 106 attack process.

## 107 F.2 Purification Speed Settings

108 This paper focuses on defending against backdoor attacks during the inference phase using purification  
109 techniques. To evaluate the purification speed, we conduct experiments using a workstation that  
110 features an Intel(R) Core(TM) i9-10900X CPU and an NVIDIA RTX3070 GPU with 8GB of memory.

111 During our experiments, we measure the classification time, which represents the duration taken by  
112 the classifier model to perform inference on a single image. Additionally, we measure the purification  
113 time, which indicates the time required by the purification model to purify a single image.

114 For the combination of purification with detection, we utilize the Scale-up method [13] as our chosen  
115 detection technique. Furthermore, the dataset used for speed evaluation consists of 5% poisoned  
116 images. Following previous settings [13], we set a batch size of one for the classifier model and  
117 report the average time based on 640 runs.

## 118 G Related Work

### 119 G.1 Backdoor Attack

120 Existing backdoor attack methods involve the injection of poisoned samples into the training process  
121 of Deep Neural Networks (DNNs). These attacks can target various types of models, including image  
122 classification models, object detection models [4, 26], contrastive learning models [2], and language  
123 models [27, 29, 41, 5]. The attackers exploit vulnerabilities by embedding adversary-specified  
124 trigger patterns into carefully selected benign samples. Backdoor attacks are characterized by their  
125 stealthiness, as the attacked models behave normally on benign samples, making the hidden triggers  
126 difficult to detect and purify.

127 There are mainly two categories of backdoor attacks for image classification tasks: patch-based  
128 and non-patch-based attacks. Patch-based attacks are attacks with triggers embedded as patches  
129 or overlays within the input samples. For example, Souri et al. [30] propose the Sleeper Agent  
130 attack, which is a sophisticated backdoor attack where an adversary subtly injects hidden triggers  
131 into an image classification model during training, remaining dormant until specific conditions  
132 activate malicious behavior. Non-patch-based attacks are attacks where triggers are integrated without  
133 explicit patching, often relying on specific input sequences or subtle modifications in the feature  
134 space [40, 16, 14]. For example, Doan et al. [9] introduce Wasserstein backdoor attack, an extension  
135 of the imperceptible backdoor concept to the latent representation. Their proposed attack manipulates  
136 inputs with imperceptible noise, matching latent representations to achieve high attack success rates  
137 while remaining stealthy in both the input and latent spaces.

### 138 G.2 Backdoor Defense

139 Existing defense methods for backdoor models can be broadly categorized into two approaches: (1)  
140 detection-based methods and (2) purification-based methods.

141 Detection-based methods focus on identifying the presence of backdoors in trained models. These  
142 methods typically involve analyzing the model’s behavior and inputs to detect any suspicious patterns  
143 or triggers that indicate the existence of a backdoor [1]. Various techniques such as anomaly  
144 detection [10, 18, 38], and statistical analysis [12, 6] have been employed to detect backdoors. The  
145 goal of detection-based methods is to provide an early warning system to identify and mitigate the  
146 risks posed by backdoor attacks.

147 On the other hand, purification-based methods aim to remove or neutralize the effects of backdoors  
148 from the model. These methods involve modifying the model or its training process to eliminate the  
149 influence of the backdoor triggers on the model’s behavior [19]. Some purification approaches focus  
150 on retraining the model using clean or carefully selected training data to reduce the impact of the  
151 backdoor [39, 35, 23, 20, 32]. Other methods aim to directly identify and neutralize the backdoor  
152 triggers within the model’s parameters or hidden representations [33, 3, 37, 36, 28]. The objective of  
153 purification-based methods is to restore the integrity and reliability of the model by eliminating the  
154 malicious behavior induced by the backdoor.



## 155 H Qualitative Results Comparison with Image Restoration Methods

156 We conducted a comparative analysis of the purification effect between our proposed method and  
 157 DDNM [34], which is a state-of-the-art image restoration technique. In order to ensure a fair compar-  
 158 ison, we implemented DDNM using their official code and applied identical linear transformations,  
 159 diffusion steps, and schedules to both methods. The qualitative results, which demonstrate the  
 160 effectiveness of our proposed approach, are presented below.

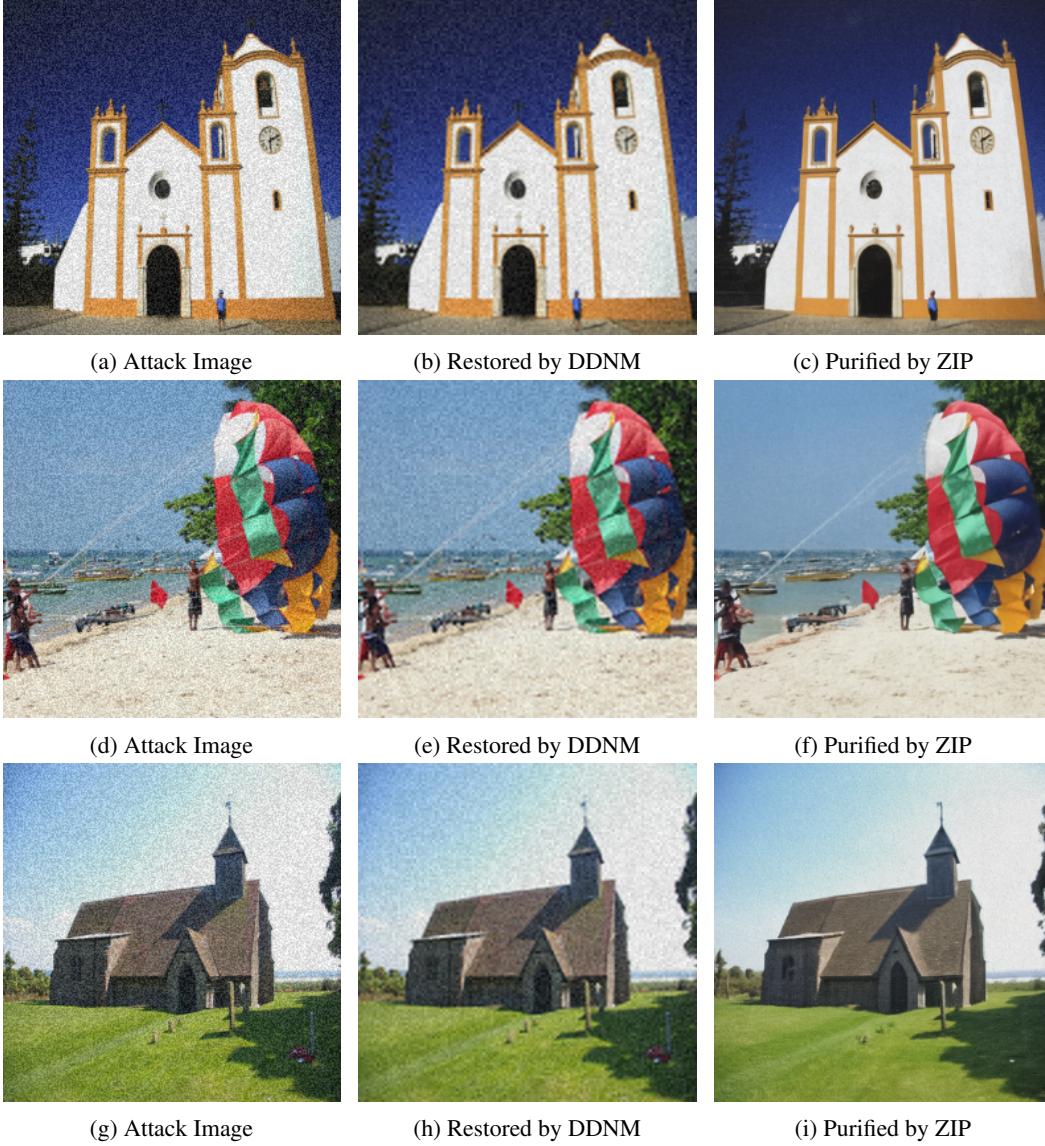

Figure 9: Comparison of DDNM and ZIP on defending Blended attack.

## 161 I Limitations

162 Due to our reliance on a pre-trained diffusion model to implement zero-shot purification, the effec-  
 163 tiveness of generating purified images may be weakened when our model is applied to highly specific  
 164 images that fall outside the distribution of pre-processed data. To mitigate this issue, we suggest  
 165 two possible solutions in future work: 1) replacing the current pre-trained diffusion model with a

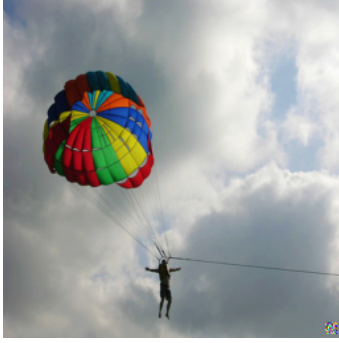

(a) Attack Image

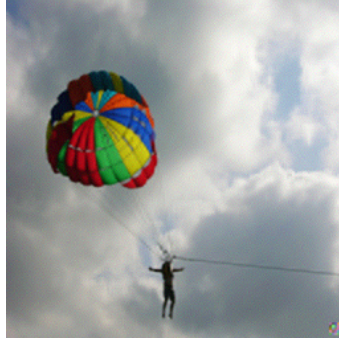

(b) Restored by DDNM

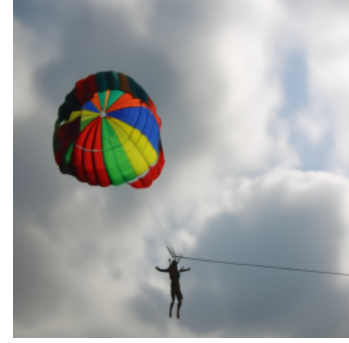

(c) Purified by ZIP

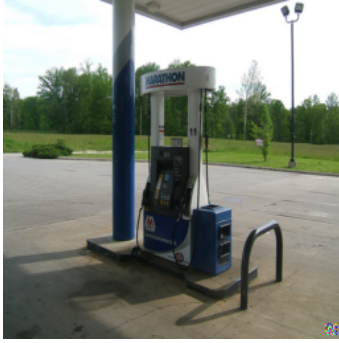

(d) Attack Image

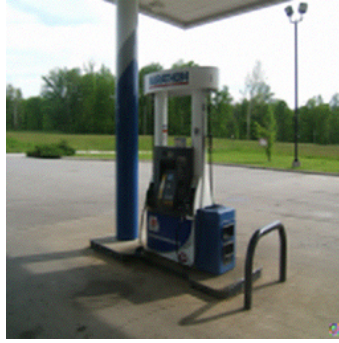

(e) Restored by DDNM

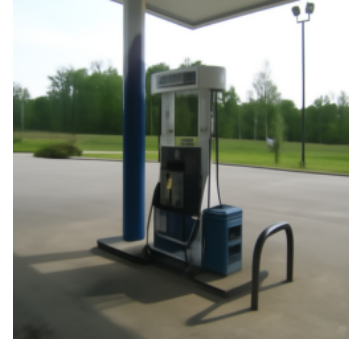

(f) Purified by ZIP

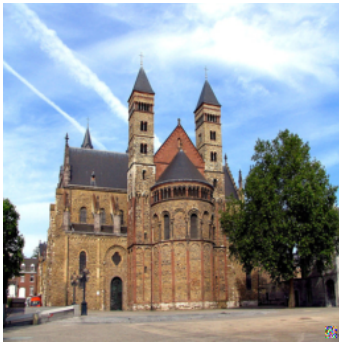

(g) Attack Image

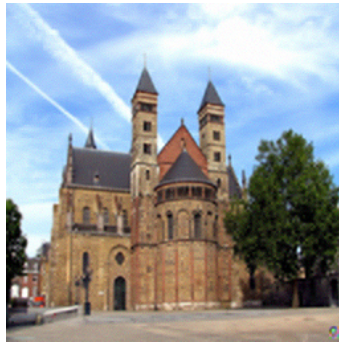

(h) Restored by DDNM

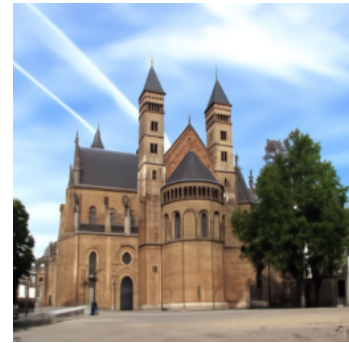

(i) Purified by ZIP

Figure 10: Comparison of DDNM and ZIP on defending BadNet attack.

more suitable pre-trained model for such specific images, and 2) collecting a subset of highly specific images to perform fine-tuning on the pre-trained model.

## References

- [1] Ruisi Cai, Zhenyu Zhang, Tianlong Chen, Xiaohan Chen, and Zhangyang Wang. Randomized channel shuffling: Minimal-overhead backdoor attack detection without clean datasets. *Advances in Neural Information Processing Systems*, 35:33876–33889, 2022.
- [2] Nicholas Carlini and Andreas Terzis. Poisoning and backdooring contrastive learning. *arXiv preprint arXiv:2106.09667*, 2021.
- [3] Shuwen Chai and Jinghui Chen. One-shot neural backdoor erasing via adversarial weight masking. *arXiv preprint arXiv:2207.04497*, 2022.
- [4] Kangjie Chen, Xiaoxuan Lou, Guowen Xu, Jiwei Li, and Tianwei Zhang. Clean-image backdoor: Attacking multi-label models with poisoned labels only. In *The Eleventh International Conference on Learning Representations*.
- [5] Kangjie Chen, Yuxian Meng, Xiaofei Sun, Shangwei Guo, Tianwei Zhang, Jiwei Li, and Chun Fan. Badpre: Task-agnostic backdoor attacks to pre-trained nlp foundation models. *arXiv preprint arXiv:2110.02467*, 2021.
- [6] Weixin Chen, Baoyuan Wu, and Haoqian Wang. Effective backdoor defense by exploiting sensitivity of poisoned samples. *Advances in Neural Information Processing Systems*, 35:9727–9737, 2022.
- [7] Xinyun Chen, Chang Liu, Bo Li, Kimberly Lu, and Dawn Song. Targeted backdoor attacks on deep learning systems using data poisoning. *arXiv preprint arXiv:1712.05526*, 2017.
- [8] Prafulla Dhariwal and Alexander Nichol. Diffusion models beat gans on image synthesis. *Advances in Neural Information Processing Systems*, 34:8780–8794, 2021.
- [9] Khoa Doan, Yingjie Lao, and Ping Li. Backdoor attack with imperceptible input and latent modification. *Advances in Neural Information Processing Systems*, 34:18944–18957, 2021.
- [10] Min Du, Ruoxi Jia, and Dawn Song. Robust anomaly detection and backdoor attack detection via differential privacy. *arXiv preprint arXiv:1911.07116*, 2019.
- [11] Tianyu Gu, Brendan Dolan-Gavitt, and Siddharth Garg. Badnets: Identifying vulnerabilities in the machine learning model supply chain. *arXiv preprint arXiv:1708.06733*, 2017.
- [12] Junfeng Guo, Ang Li, and Cong Liu. Aeva: Black-box backdoor detection using adversarial extreme value analysis. *International Conference on Learning Representations*, 2022.
- [13] Junfeng Guo, Yiming Li, Xun Chen, Hanqing Guo, Lichao Sun, and Cong Liu. Scale-up: An efficient black-box input-level backdoor detection via analyzing scaled prediction consistency. *The Eleventh International Conference on Learning Representations*, 2023.
- [14] Jonathan Hayase and Sewoong Oh. Few-shot backdoor attacks via neural tangent kernels. *arXiv preprint arXiv:2210.05929*, 2022.
- [15] Jonathan Ho, Ajay Jain, and Pieter Abbeel. Denoising diffusion probabilistic models. *Advances in Neural Information Processing Systems*, 33:6840–6851, 2020.
- [16] Sanghyun Hong, Nicholas Carlini, and Alexey Kurakin. Handcrafted backdoors in deep neural networks. *Advances in Neural Information Processing Systems*, 35:8068–8080, 2022.
- [17] Jeremy Howard. Imagenette. <https://github.com/fastai/imagenette>, 2019.
- [18] Xiaoling Hu, Xiao Lin, Michael Cogswell, Yi Yao, Susmit Jha, and Chao Chen. Trigger hunting with a topological prior for trojan detection. *arXiv preprint arXiv:2110.08335*, 2021.
- [19] Kunzhe Huang, Yiming Li, Baoyuan Wu, Zhan Qin, and Kui Ren. Backdoor defense via decoupling the training process. *arXiv preprint arXiv:2202.03423*, 2022.



- [20] Charles Jin, Melinda Sun, and Martin Rinard. Incompatibility clustering as a defense against backdoor poisoning attacks. In *The Eleventh International Conference on Learning Representations*.
- [21] Bahjat Kawar, Michael Elad, Stefano Ermon, and Jiaming Song. Denoising diffusion restoration models. *Advances in Neural Information Processing Systems*, 2022.
- [22] Alex Krizhevsky, Geoffrey Hinton, et al. Learning multiple layers of features from tiny images. 2009.
- [23] Yige Li, Xixiang Lyu, Nodens Koren, Lingjuan Lyu, Bo Li, and Xingjun Ma. Anti-backdoor learning: Training clean models on poisoned data. *Advances in Neural Information Processing Systems*, 34:14900–14912, 2021.
- [24] Yiming Li, Mengxi Ya, Yang Bai, Yong Jiang, and Shu-Tao Xia. Backdoorbox: A python toolbox for backdoor learning. *arXiv preprint arXiv:2302.01762*, 2023.
- [25] Yiming Li, Tongqing Zhai, Yong Jiang, Zhifeng Li, and Shu-Tao Xia. Backdoor attack in the physical world. *arXiv preprint arXiv:2104.02361*, 2021.
- [26] Yiming Li, Haoxiang Zhong, Xingjun Ma, Yong Jiang, and Shu-Tao Xia. Few-shot backdoor attacks on visual object tracking. *arXiv preprint arXiv:2201.13178*, 2022.
- [27] Yepeng Liu, Bo Feng, and Qian Lou. Trojtext: Test-time invisible textual trojan insertion. *arXiv preprint arXiv:2303.02242*, 2023.
- [28] Yingqi Liu, Wen-Chuan Lee, Guanhong Tao, Shiqing Ma, Yousra Aafer, and Xiangyu Zhang. Abs: Scanning neural networks for back-doors by artificial brain stimulation. In *Proceedings of the 2019 ACM SIGSAC Conference on Computer and Communications Security*, pages 1265–1282, 2019.
- [29] Guangyu Shen, Yingqi Liu, Guanhong Tao, Qiuling Xu, Zhuo Zhang, Shengwei An, Shiqing Ma, and Xiangyu Zhang. Constrained optimization with dynamic bound-scaling for effective nlp backdoor defense. In *International Conference on Machine Learning*, pages 19879–19892. PMLR, 2022.
- [30] Hossein Souri, Liam Fowl, Rama Chellappa, Micah Goldblum, and Tom Goldstein. Sleeper agent: Scalable hidden trigger backdoors for neural networks trained from scratch. *Advances in Neural Information Processing Systems*, 35:19165–19178, 2022.
- [31] Johannes Stalldkamp, Marc Schlipsing, Jan Salmen, and Christian Igel. Man vs. computer: Benchmarking machine learning algorithms for traffic sign recognition. *Neural networks*, 32:323–332, 2012.
- [32] Guanhong Tao, Yingqi Liu, Guangyu Shen, Qiuling Xu, Shengwei An, Zhuo Zhang, and Xiangyu Zhang. Model orthogonalization: Class distance hardening in neural networks for better security. In *2022 IEEE Symposium on Security and Privacy (SP)*, pages 1372–1389. IEEE, 2022.
- [33] Haotao Wang, Junyuan Hong, Aston Zhang, Jiayu Zhou, and Zhangyang Wang. Trap and replace: Defending backdoor attacks by trapping them into an easy-to-replace subnetwork. *arXiv preprint arXiv:2210.06428*, 2022.
- [34] Yinhuai Wang, Jiwen Yu, and Jian Zhang. Zero-shot image restoration using denoising diffusion null-space model. *arXiv preprint arXiv:2212.00490*, 2022.
- [35] Zhenting Wang, Hailun Ding, Juan Zhai, and Shiqing Ma. Training with more confidence: Mitigating injected and natural backdoors during training. *Advances in Neural Information Processing Systems*, 35:36396–36410, 2022.
- [36] Zhenting Wang, Kai Mei, Juan Zhai, and Shiqing Ma. Unicorn: A unified backdoor trigger inversion framework. *arXiv preprint arXiv:2304.02786*, 2023.
- [37] Dongxian Wu and Yisen Wang. Adversarial neuron pruning purifies backdoored deep models. *Advances in Neural Information Processing Systems*, 34:16913–16925, 2021.

- 259 [38] Zhen Xiang, David J Miller, and George Kesidis. Post-training detection of backdoor attacks  
260 for two-class and multi-attack scenarios. *arXiv preprint arXiv:2201.08474*, 2022.
- 261 [39] Yi Zeng, Si Chen, Won Park, Z Morley Mao, Ming Jin, and Ruoxi Jia. Adversarial unlearning  
262 of backdoors via implicit hypergradient. *arXiv preprint arXiv:2110.03735*, 2021.
- 263 [40] Zhiyuan Zhang, Lingjuan Lyu, Weiqiang Wang, Lichao Sun, and Xu Sun. How to inject back-  
264 doors with better consistency: Logit anchoring on clean data. *arXiv preprint arXiv:2109.01300*,  
265 2021.
- 266 [41] Biru Zhu, Yujia Qin, Ganqu Cui, Yangyi Chen, Weilin Zhao, Chong Fu, Yangdong Deng,  
267 Zhiyuan Liu, Jingang Wang, Wei Wu, et al. Moderate-fitting as a natural backdoor defender for  
268 pre-trained language models. *Advances in Neural Information Processing Systems*, 35:1086–  
269 1099, 2022.
